# Supplementary material for: Soil Viruses Are Underexplored Players in Ecosystem Carbon Processing
Source: PubMed Central journal article supplement (PMC6172770; doi:10.1128/msystems.00076-18), 2018-10-02
Supplement: sys005182265s1.pdf [file sys005182265s1.pdf]

## 1 **Supplementary text**

### 2 *Addressing overlooked potential contaminants*

3 To aid in identifying possible contamination, we ran a nucleotide Blast of all the  
4 assembled contigs against a custom database of the >1500 Stordalen Mire MAGs (for  
5 information on the MAGs see 1). No microbial contamination was detected from the microbial  
6 lineages represented in the MAGs. Conversely, contamination of GTAs seems likely. The main  
7 method used to identify viruses (VirSorter; 2) identifies viruses primarily based on identification  
8 of viral genes. GTAs have been confused for viruses or viral contamination because they have  
9 several viral-like genes to package nucleic acids (e.g. genes that encode capsids and tails; full list  
10 reviewed in 3). We tested for GTAs by assessing the diversity of the contigs identified as  
11 microbial (since GTAs capture a subset of lineages) and running a nucleotide Blast of the five  
12 types of GTAs previously identified (3–5). In the seven viromes, 25% of assembled reads  
13 matched bacteria from the family *Rhodobacteraceae*, and from genera *Bartonella* and  
14 *Desulfovibrio*. This analysis likely doesn't capture the total GTA contamination because current  
15 GTA families have been identified only from isolates (3). The remaining contigs were divided  
16 into those highly likely to belong to soil viruses (as VirSorter categories 1 or 2; 2) and those of  
17 indeterminable origin (i.e. VirSorted viral contigs not from categories 1 or 2). Lastly,  
18 contamination from mobile genetic elements (MGEs) can result in low viral yield. MGEs are any  
19 genetic material that move around on a genome, within an organism, or between organisms (6).  
20 Viruses and GTAs are also types of MGEs and others, but not limited to, include transposons,  
21 plasmids, and introns. Here, we use MGE to label contamination (i.e. non-viral) and three MGE-  
22 looking contigs were identified as viruses by VirSorter (Table S1). It is highly unlikely that these  
23 MGEs remained in our samples after CsCl purification and may actually be plasmid prophages  
24 (reviewed in 7), but to be as accurate as possible with our findings, we did not include these three  
25 contigs. Additionally, we did not include VirSorter category 3 contigs, which are likely to be soil  
26 viruses, since the extraction methods were specifically targeted to obtain soil viruses and current  
27 reference databases dramatically under-represents soil viruses (causing VirSorter to put them in  
28 category 3; more details in 2).

### 29 *Using viral-host linkages for further comparisons*

30 Since viral replication requires the take-over of host translation machinery during  
31 infection, viruses may be genetically tuned to interact with that machinery more efficiently. We  
32 searched the 17 host-linked viral genomes for two known mechanisms of such genetic tuning.  
33 Viruses can mimic host synonymous codon usage, increasing translation speed and fidelity, level  
34 of gene expression, and protein folding (15–17). We assessed the similarity of codon usage  
35 frequency for the Mire viruses and their inferred hosts (Fig. S6). The virus-host groups clustered  
36 only loosely at the genus/species level (notably better at the phylum level; Fig S6), except for  
37 vOTU\_28 and its associated host *Smithella* sp. SDB, which were quite similar. This 'codon  
38 harmonization' (described in 15) between the two further supports their viral-host CRISPR  
39 linkage and inferred co-evolution. Caveats to this approach include the imperfect assessment of  
40 viral (and host) codon usage due to incomplete genomes, with the lack of viral single copy genes  
41 precluding clarity on how incomplete they are. To assess whether contig length might be

42 influencing the similarity of virus and host codon usage frequency, we evaluated their correlation  
43 (Fig. S6), which was significant but very weak ( $r^2=0.03$ ,  $P$  value  $<0.01$ ), suggesting that longer  
44 contigs would have minimal impact on viral-host codon usage similarity.

#### 45 *Putative archaeal viruses*

46 Due to VirSorter's reliance on existing databases, viruses from undersampled  
47 environments (e.g. soil) can be missed. Due to the importance of archaea in this system, for  
48 example the strong correlation between CH<sub>4</sub> isotopic signatures and a single lineage of  
49 methanogens from the Mire (Candidatus *Methanoflorens stordalenmirensis*; 18, 19), we  
50 performed an extensive search specifically targeting archaeal viruses using the recently  
51 developed Metagenomic Archaeal Virus Detector (MArVD; 20), which retrieves archaeal virus-  
52 like contigs from VirSorted-viromes based on a set of genes known to be identified with archaea.  
53 Using a stringent threshold (viral contig  $\geq 10$  kb and belonging to category 1 or 2; 20), MArVD  
54 identified 2 putative archaeal vOTUs: 165 and 225, which were  $\sim 16$  and 12 kb, respectively, but  
55 had not been in the 53-vOTU dataset because they did not meet the stringent requirement of  
56 being in VirSorter categories 1 or 2 (2). Both vOTUs' genes switch strands often and they were  
57 appreciably genetically novel with 83% of genes unknown for vOTU\_165 and 75% for  
58 vOTU\_225, and both had no connectivity to known viruses in the VC network where only three  
59 ORFs from each grouped into protein clusters, with the remaining ORFs (15 from vOTU\_165  
60 and 19 from vOTU\_225) being singletons (proteins having no genetic similarity to any proteins  
61 in the RefSeq database). Of the 3 shared PCs, vOTU\_165 shared PC\_03881 with archaeal virus,  
62 Halovirus HCTV-1 (data not shown), which also included archaeal, bacterial, and bacteriophage  
63 proteins. Phylogenetic reconstruction of PC\_03881 revealed monophyly of vOTU\_165's gene 16  
64 with genes from *Pseudoalteromonas* (data not shown). Among the other predicted genes from  
65 the two putative archaeal viruses, we identified several more for both vOTUs that clustered as  
66 bacterial genes, including several ribosomal proteins (data not shown). We therefore propose that  
67 both contigs are likely bacterial genome fragments, misidentified by MArVD as it relies on a  
68 database with few archaeal representatives and uses keywords to identify archaeal viruses;  
69 vOTUs 165 and 225 were identified as potential archaeal viruses based on the identified  
70 homologous gene being previously characterized in archaea.

71 We therefore propose that both contigs are likely bacterial genome fragments,  
72 misidentified by MArVD, because the ancestry of PC\_03881 (from contig 165) stems from the  
73 archaeal domain with a recent transition into bacterial domain (data not shown). This  
74 misidentification by MArVD is because it relies on a database with few archaeal representatives  
75 and uses keywords to identify archaeal viruses; it identified vOTU\_165 and vOTU\_225 as  
76 potential archaeal viruses based on the identified orthologous gene being previously  
77 characterized in archaea.

#### 78 **Methods and Materials**

79 Richness, Shannon's Diversity index and Pielou's evenness index were calculated for  
80 each virome in R (CRAN 1.0.8 package vegan).

81 Multiple analyses were done to evaluate the potential role storage conditions had on the  
82 viral communities. Hierarchical clustering of the viromes was done using Bray-Curtis

83 dissimilarity, with an average dissimilarity used for viromes (i.e. dissimilarities are averaged at  
84 each step between viromes for the agglomerative method) in R (CRAN 1.0.8 package pvclust).  
85 Assessment of differentiation among reads was performed using Fizkin (a social network  
86 analysis; 21) on CyVerse (<http://www.cyverse.org>) using the default parameters.  
87 More analyses were done to better understand viral-host linkages. For viral-host linkages via  
88 CRISPRs, a custom Python script was used to process the Crass data  
89 (<https://bitbucket.org/MAVERICLab/>). Briefly, data Emerson et al. (22) was used to associate  
90 viral sequences to microbial bins. First, the assigned taxonomy was parsed and the number of  
91 matches to Archaea and Bacteria were summed. If a virus matched a host bin, then this was a  
92 “hit” and the number of bins with matches were summed.

93 Mean synonymous codon usage was calculated by determining the mean of the  
94 differences in codon usage frequency for each amino acid for the 55 vOTUs and their linked  
95 hosts. Codon usage was determined using CodonW (John Peden, Oxford University, available  
96 at <http://bioweb.pasteur.fr/seqanal/interfaces/codonw.html>) with default parameters.  
97

## 98 References

- 99 1. Woodcroft, B. J. , Singleton, C. M., Boyd, J. A. , Evans, P. N. , Joanne B. Emerson, Ahmed  
100 A. F. Zayed, Hoelzle, R. D., Lamberton, T. O., McCalley, C. K., Hodgkins, S. B. , Wilson,  
101 Samuel O. Purvine, Carrie D. Nicora, Changsheng Li, Steve Frolking R. M., Chanton, J. P. ,  
102 Crill, P. M., Saleska, S. R., Rich, V. I., Tyson, G. W. Genome-centric view of carbon  
103 processing in thawing permafrost. *Nature*, 2018; DOI: 10.1038/s41586-018-0338-1.
- 104 2. Roux, S. Enault, F. Hurwitz, B.L. and Sullivan, M.B. 2015. VirSorter: mining viral signal  
105 from microbial genomic data. *PeerJ*, 3, p.e985.
- 106 3. Lang, A.S., Westbye, A.B. and Beatty, J.T., 2017. The Distribution, Evolution, and Roles of  
107 Gene Transfer Agents (GTAs) in Prokaryotic Genetic Exchange. *Annual review of*  
108 *virology*, 4(1).
- 109 4. Lang, A.S. and Beatty, J.T., 2007. Importance of widespread gene transfer agent genes in  $\alpha$ -  
110 proteobacteria. *Trends in microbiology*, 15(2), pp.54-62.
- 111 5. Hurwitz, B.L., Hallam, S.J. and Sullivan, M.B., 2013. Metabolic reprogramming by viruses  
112 in the sunlit and dark ocean. *Genome biology*, 14(11), p.R123.
- 113 6. Frost, L.S., Leplae, R., Summers, A.O. and Toussaint, A., 2005. Mobile genetic elements: the  
114 agents of open source evolution. *Nature Reviews Microbiology*, 3(9), p.722.
- 115 7. Casjens, S., 2003. Prophages and bacterial genomics: what have we learned so  
116 far? *Molecular microbiology*, 49(2), pp.277-300.
- 117 8. Kunin, V., Sorek, R. and Hugenholtz, P., 2007. Evolutionary conservation of sequence and  
118 secondary structures in CRISPR repeats. *Genome biology*, 8(4), p.R61.
- 119 9. Horvath, P., Romero, D.A., Coûté-Monvoisin, A.C., Richards, M., Deveau, H., Moineau, S.,  
120 Boyaval, P., Fremaux, C. and Barrangou, R., 2008. Diversity, activity, and evolution of  
121 CRISPR loci in *Streptococcus thermophilus*. *Journal of bacteriology*, 190(4), pp.1401-1412.
- 122 10. Shmakov, S.A., Sitnik, V., Makarova, K.S., Wolf, Y.I., Severinov, K.V. and Koonin, E.V.,  
123 2017. The CRISPR Spacer Space Is Dominated by Sequences from Species-Specific  
124 Mobilomes. *mBio*, 8(5), pp.e01397-17.
- 125 11. Marraffini, L.A. and Sontheimer, E.J., 2010. Self versus non-self discrimination during  
126 CRISPR RNA-directed immunity. *Nature*, 463(7280), p.568.

- 127 12. Kokfelt, U., Rosén, P., Schoning, K., Christensen, T.R., Förster, J., Karlsson, J., Reuss, N.,  
128 Rundgren, M., Callaghan, T.V., Jonasson, C. and Hammarlund, D., 2009. Ecosystem  
129 responses to increased precipitation and permafrost decay in subarctic Sweden inferred from  
130 peat and lake sediments. *Global Change Biology*, 15(7), pp.1652-1663.
- 131 13. Olefeldt, D., Roulet, N., Giesler, R. and Persson, A., 2013. Total waterborne carbon export  
132 and DOC composition from ten nested subarctic peatland catchments—importance of  
133 peatland cover, groundwater influence, and inter-annual variability of precipitation  
134 patterns. *Hydrological Processes*, 27(16), pp.2280-2294.
- 135 14. Mondav, R., McCalley, C.K., Hodgkins, S.B., Frolking, S., Saleska, S.R., Rich, V.I.,  
136 Chanton, J.P. and Crill, P.M., 2017. Microbial network, phylogenetic diversity and  
137 community membership in the active layer across a permafrost thaw gradient. *Environmental*  
138 *Microbiology*.
- 139 15. Angov, E., Legler, P.M. and Mease, R.M., 2011. Adjustment of codon usage frequencies by  
140 codon harmonization improves protein expression and folding. In *Heterologous Gene*  
141 *Expression in E. coli* (pp. 1-13). Humana Press.
- 142 16. Butt, A.M., Nasrullah, I., Qamar, R. and Tong, Y., 2016. Evolution of codon usage in Zika  
143 virus genomes is host and vector specific. *Emerging Microbes & Infections*, 5(10), p.e107.
- 144 17. Kumar, N., Bera, B.C., Greenbaum, B.D., Bhatia, S., Sood, R., Selvaraj, P., Anand, T.,  
145 Tripathi, B.N. and Virmani, N., 2016. Revelation of influencing factors in overall codon  
146 usage bias of equine influenza viruses. *PloS one*, 11(4), p.e0154376.
- 147 18. Mondav, R., Woodcroft, B.J., Kim, E.H., McCalley, C.K., Hodgkins, S.B., Crill, P.M.,  
148 Chanton, J., Hurst, G.B., VerBerkmoes, N.C., Saleska, S.R. and Hugenholtz, P., 2014.  
149 Discovery of a novel methanogen prevalent in thawing permafrost. *Nature*  
150 *communications*, 5, p.3212.
- 151 19. McCalley, C.K., Woodcroft, B.J., Hodgkins, S.B., Wehr, R.A., Kim, E.H., Mondav, R., Crill,  
152 P.M., Chanton, J.P., Rich, V.I., Tyson, G.W. and Saleska, S.R., 2014. Methane dynamics  
153 regulated by microbial community response to permafrost thaw. *Nature*, 514(7523), pp.478-  
154 481.
- 155 20. Vik, D.R., Roux, S., Brum, J.R., Bolduc, B., Emerson, J.B., Padilla, C.C., Stewart, F.J. and  
156 Sullivan, M.B., 2017. Putative archaeal viruses from the mesopelagic ocean. *PeerJ*, 5,  
157 p.e3428.
- 158 21. Bolduc, B., Youens-Clark, K., Roux, S., Hurwitz, B.L. and Sullivan, M.B., 2016. iVirus:  
159 facilitating new insights in viral ecology with software and community data sets imbedded in  
160 a cyberinfrastructure. *The ISME Journal*.
- 161 22. Emerson, J.B., Roux, S., Brum, J.R., Bolduc, B., Woodcroft, B.J., Jang, H-B., Singleton,  
162 C.M., Solden, L. M., Naas, A. E., Boyd, J. A., Hodgkins, S. B., Wilson, R. M., Trubl, G., Li,  
163 C., L., Frolking, S., Pope, P. B., Wrighton, K. C., Crill, P. M., Chanton, J. P., Saleska, S. R.,  
164 Tyson, G. W., Rich V. I., Sullivan, M. B. Host-linked soil viral ecology along a permafrost  
165 thaw gradient. *Nature Microbiology*, 2018; DOI: 10.1038/s41564-018-0190-y.
- 166 23. Daly, R.A., Borton, M.A., Wilkins, M.J., Hoyt, D.W., Kountz, D.J., Wolfe, R.A., Welch,  
167 S.A., Marcus, D.N., Trexler, R.V., MacRae, J.D. and Krzycki, J.A. 2016. Microbial  
168 metabolisms in a 2.5-km-deep ecosystem created by hydraulic fracturing in shales. *Nature*  
169 *Microbiology*, 1, p.16146.
- 170 24. Pratama, A.A. and van Elsas, J.D., 2018. The ‘Neglected’ Soil Virome—Potential Role and  
171 Impact. *Trends in Microbiology*.
